# Supplementary material
Source: PubMed Central journal article supplement (PMC2527462)
Supplement: NIHMS62261-supplement-si20070404_102.pdf [file NIHMS62261-supplement-si20070404_102.pdf]

## Supporting Information

### Origins of Femtomolar Protein-Ligand Binding: Hydrogen Bond Cooperativity and Desolvation Energetics in the Biotin-(Strept)Avidin Binding-Site

Jason DeChancie and K.N. Houk\*

Contribution from the Department of Chemistry and Biochemistry, University of California, Los Angeles California 90095-1569

#### Computational Details

**DFT and *ab initio*.** All calculations were carried out using the Gaussian 03 suite of programs. The hybrid density functional Becke3LYP<sup>1</sup> with the 6-31+G(d,p) basis set was used to optimize all reported structures. MPWB1K, developed by Truhlar and co-workers,<sup>2</sup> based on the modified Perdew and Wang 1991 functional (MPW)<sup>3</sup> and Becke's 1995 meta correlation functional<sup>4</sup> was used for select structures (noted below). MP2 single point energies<sup>5</sup> were carried out on each DFT optimized structure using the 6-31+G(d,p) basis set. Correction for basis set superposition error (BSSE) was performed using the counterpoise method of Boys and Bernardi at MP2/6-31+G(d,p) level.<sup>6</sup>

**CPCM-SCRF.** All calculations utilized the UAKS cavity size at the HF/6-31+G(p,d) level.<sup>7</sup> Single point calculations were carried out on the biotin-residue or biotin-water complexes stationary points for calculation of solvation energies. Free energies of solvation energy were then added to MP2/6-31+G(d,p) electronic energies. A dielectric constant of 4.33 and 78.39 was used to simulate a hydrophobic protein environment and water, respectively.

- 
- (1) (a) Becke, A. D. *Phys. Rev. A* **1988**, *38*, 3098-3100. (B) Lee, C.; Yang, W.; Parr, R. G. *Phys. Rev. B* **1988**, *37*, 785-789. (C) Becke, A. D. *J. Chem. Phys.* **1993**, *98*, 5648-5652.
  - (2) Zhao, Y.; Truhlar, D. G. *J. Phys. Chem. A* **2004**, *108*, 6908-6918.
  - (3) Perdew, J. P. In *Electronic Structure of Solids*; Ziesche, P., Eschig, H., Eds.; Akademie Verlag: Berlin, 1991, p 11.
  - (4) Becke, A. D. *J. Chem. Phys.* **1996**, *104*, 1040-1046.
  - (5) Møller, C.; Plesset, M. S. *Phys. Rev.* **1934**, *46*, 618-622.
  - (6) (a) Duijneveldt, F. B. v.; Duijneveldt-van de Rijdt, J. G. C. M. v.; Lenthe, J. H. v. *Chem. Rev.* **1994**, *94*, 1873-1885. (b) Gutowski, M.; Duijneveldt-van de Rijdt, J. G. C. M. v. *J. Chem. Phys.* **1993**, *98*, 4728-4737. (c) Frisch, M. J.; Del Bene, J. E.; Binkley, J. S.; Schaefer, H. F. *J. Chem. Phys.* **1986**, *84*, 2279-2289. (d) Schwenke, D. W.; Truhlar, D. G. *J. Chem. Phys.* **1985**, *82*, 2418-2426. (e) Szalewicz, K.; Cole, S. J.; Kolos, W.; Bartlett, R. J. *J. Chem. Phys.* **1988**, *89*, 3662-3673.
  - (7) (a) Klamt, A.; Schüürmann, G. *J. Chem. Soc., Perkin Trans 2* **1993**, 799-805. (b) Andzelm, J.; Kölmel, C.; Klamt, A. *J. Chem. Phys.* **1995**, *103*, 9312-9320. (c) Barone, V.; Cossi, M. *J. Phys. Chem. A* **1998**, *102*, 1995-2001. (d) Cossi, M.; Rega, N.; Scalmani, G.; Barone, V. *J. Comput. Chem.* **2003**, *24*, 669-681.

**QM/MM/MC.** All QM/MM were carried out using BOSS 4.6.<sup>8</sup> The solute was treated with PDDG/PM3 method.<sup>9</sup> The solvent molecules were represented by the TIP4P water model.<sup>10</sup> The Metropolis Monte Carlo (MC) simulations were performed in a periodic box of 750 (minus the number of non-hydrogen atoms of the solute) TIP4P water molecules at 25 °C and 1 atm in the NPT ensemble.<sup>11</sup> Each simulation consisted 3.2M configurations of equilibration and 20 million configurations of averaging. Partial charges were obtained from the CM3 charge model.<sup>12</sup>

---

(8) Jorgensen, W. L.; Tirado-Rives, J. *J. Comput. Chem.* **2005**, *26*, 1689-1700.

(9) (a) Repasky, M. P.; Chandrasekhar, J.; Jorgensen, W. L. *J. Comput. Chem.* **2002**, *23*, 1601-1622. (b) Tubert-Brohman, I.; Guimarães, C. R. W.; Repasky, M. P.; Jorgensen, W. L.; Brauman, J. I. *J. Am. Chem. Soc.* **2003**, *25*, 138-150.

(10) Jorgensen, W. L.; Chandrasekhar, J.; Madura, J. D.; Impey, W.; Klein, M. L. *J. Chem. Phys.* **1983**, *79*, 926-935.

(11) Jorgensen, W. L. In *Encyclopedia of Computational Chemistry*; Schleyer, P. v. R., Ed.; Wiley: New York, 1998; Vol. 3, p 1754-1763.

(12) Thompson, J. D.; Cramer, C. J.; Truhlar, D. G. *J. Comput. Chem.* **2003**, *24*, 1291-1304.

**MD.** Preparation of the systems, starting from the apo-protein crystal structures, included addition of hydrogen atoms and a cubic box of TIP3P<sup>13</sup> water molecules extending 10 Å from the solute using the xLEaP module of AMBER 8.<sup>14</sup> The Duan et al. (ff03) force field<sup>15</sup> was employed to describe the proteins and general Amber force field (gaff) for biotin.<sup>16</sup> Long-range electrostatic forces were treated using the particle mesh Ewald (PME) method<sup>17</sup> using default parameters assigned by AMBER. Trajectories were integrated with a 1 fs time step. All simulations were carried out under constant temperature (300 K) and pressure (1 atm). The avidin system was equilibrated for 70 ps and the streptavidin for 133 ps. The SHAKE algorithm<sup>18</sup> for all hydrogens and a nonbonding pair cutoff of 9 Å was used. Average structures were generated using the PTRAJ utility for the unliganded avidin over 60–70 ps and for unliganded streptavidin over 123–133 ps.

- 
- (13) Jorgensen, W. L.; Chandrasekhar, J.; Madura, J. D.; Impey, W.; Klein, M. L. *J. Chem. Phys.* **1983**, *79*, 926-935.
- (14) Case, D. A.; Darden, T. A.; Cheatham, T. E., III; Simmerling, J.; Wang, J.; Duke, R. E.; Luo, R.; Merz, K. M.; Wang, B.; Pearlman, D. A.; Crowley, M.; Brozell, S.; Tsui, V.; Gohlke, H.; Mongan, J.; Hornak, V.; Cui, G.; Beroza, P.; Schafmeister, C.; Caldwell, J. W.; Ross, W. S.; Kollman, P. A. University of California, San Francisco, 2004.
- (15) Duan, Y.; Wu, C.; Chowdhury, S.; Lee, M. C.; Xiong, G.; Zhang, R.; Cieplak, P.; Luo, R.; Lee, T. J. *Comput. Chem.* **2003**, *24*, 1999-2012.
- (16) Wang, J.; Wolf, R. M.; Caldwell, J. W.; Kollman, P. A.; Case, D. A. *J. Comput. Chem.* **2004**, *25*, 1157-1174.
- (17) (a) Essmann, U.; Perera, L.; Berkowitz, M. L.; Darden, T.; York, D.; Pedersen, L. *J. Chem. Phys.* **1995**, *103*, 8577-8593. (b) van Gusteren, W. F.; Berendes, H. J. C. *Mol. Phys.* **1977**, *34*, 1311.
- (18) van Gusteren, W. F.; Berendes, H. J. C. *Mol. Phys.* **1977**, *34*, 1311.

### ***Gaussian 03 Citation***

Gaussian 03, Revision C.02, M. J. Frisch, G. W. Trucks, H. B. Schlegel, G. E. Scuseria, M. A. Robb, J. R. Cheeseman, J. A. Montgomery, Jr., T. Vreven, K. N. Kudin, J. C. Burant, J. M. Millam, S. S. Iyengar, J. Tomasi, V. Barone, B. Mennucci, M. Cossi, G. Scalmani, N. Rega, G. A. Petersson, H. Nakatsuji, M. Hada, M. Ehara, K. Toyota, R. Fukuda, J. Hasegawa, M. Ishida, T. Nakajima, Y. Honda, O. Kitao, H. Nakai, M. Klene, X. Li, J. E. Knox, H. P. Hratchian, J. B. Cross, V. Bakken, C. Adamo, J. Jaramillo, R. Gomperts, R. E. Stratmann, O. Yazyev, A. J. Austin, R. Cammi, C. Pomelli, J. W. Ochterski, P. Y. Ayala, K. Morokuma, G. A. Voth, P. Salvador, J. J. Dannenberg, V. G. Zakrzewski, S. Dapprich, A. D. Daniels, M. C. Strain, O. Farkas, D. K. Malick, A. D. Rabuck, K. Raghavachari, J. B. Foresman, J. V. Ortiz, Q. Cui, A. G. Baboul, S. Clifford, J. Cioslowski, B. B. Stefanov, G. Liu, A. Liashenko, P. Piskorz, I. Komaromi, R. L. Martin, D. J. Fox, T. Keith, M. A. Al-Laham, C. Y. Peng, A. Nanayakkara, M. Challacombe, P. M. W. Gill, B. Johnson, W. Chen, M. W. Wong, C. Gonzalez, and J. A. Pople, Gaussian, Inc., Wallingford CT, 2004.

### ***Amber 8 Citation***

Case, D. A.; Darden, T. A.; Cheatham, T. E., III; Simmerling, J.; Wang, J.; Duke, R. E.; Luo, R.; Merz, K. M.; Wang, B.; Pearlman, D. A.; Crowley, M.; Brozell, S.; Tsui, V.; Gohlke, H.; Mongan, J.; Hornak, V.; Cui, G.; Beroza, P.; Schafmeister, C.; Caldwell, J. W.; Ross, W. S.; Kollman, P. A. Amber 8, University of California, San Francisco, 2004.

### *B3LYP Geometries and ab initio and CPCM energies, and BSSE corrections*

Cartesian coordinates and distances are reported in Ångstroms. MP2 electronic energies and CPCM solvation energies are reported in Hartrees. BSSE corrections are reported in Hartrees.

#### Streptavidin Model:

|   |           |           |           |
|---|-----------|-----------|-----------|
| C | -2.130176 | -2.096306 | 0.098852  |
| C | -0.898451 | -2.926648 | 0.621388  |
| N | 0.120002  | -1.902498 | 0.794044  |
| C | -0.371894 | -0.651744 | 0.541706  |
| N | -1.632597 | -0.728343 | 0.105480  |
| O | 0.298940  | 0.416763  | 0.709791  |
| H | -2.271664 | 0.097861  | -0.104385 |
| C | -0.522591 | -3.991893 | -0.429690 |
| H | -1.062577 | -4.925720 | -0.231239 |
| H | 0.550370  | -4.198576 | -0.426644 |
| C | -2.529448 | -2.600667 | -1.301316 |
| H | -3.302716 | -3.371450 | -1.217251 |
| H | -2.926520 | -1.786727 | -1.907321 |
| S | -1.018633 | -3.319190 | -2.064293 |
| H | -3.003406 | -2.171817 | 0.754359  |
| H | -1.114669 | -3.419502 | 1.578971  |
| H | 0.968251  | -2.036131 | 1.346648  |
| H | -0.509815 | 2.281232  | 0.156299  |
| N | -1.118847 | 3.054542  | -0.094973 |
| H | -2.091382 | 2.807032  | -0.296445 |
| C | -0.645247 | 4.309742  | -0.166300 |
| O | -1.284895 | 5.320346  | -0.461932 |
| H | 0.435376  | 4.371329  | 0.078933  |
| H | 1.926288  | 0.371130  | 0.598108  |
| H | 0.306803  | 0.908912  | 2.543655  |
| O | 2.925739  | 0.281313  | 0.637365  |
| O | 0.316733  | 1.051629  | 3.509407  |
| C | -0.789624 | 1.873556  | 3.858043  |
| H | -0.766776 | 2.003653  | 4.944688  |
| H | -0.733680 | 2.864514  | 3.387093  |
| H | -1.749009 | 1.414852  | 3.581084  |
| C | 3.526682  | 0.573567  | -0.549258 |
| C | 4.924548  | 0.484281  | -0.618624 |
| C | 2.795942  | 0.959386  | -1.683314 |
| C | 5.582991  | 0.779081  | -1.812961 |
| H | 5.475543  | 0.187230  | 0.268728  |
| C | 3.468518  | 1.253073  | -2.871261 |
| H | 1.713603  | 1.024099  | -1.628787 |
| C | 4.862034  | 1.165957  | -2.947962 |
| H | 6.667009  | 0.707304  | -1.854971 |
| H | 2.892146  | 1.551261  | -3.742860 |
| H | 5.377480  | 1.396125  | -3.875836 |
| O | 2.700310  | -1.998957 | 2.258918  |
| H | 3.005247  | -1.240894 | 1.722084  |
| C | 2.701755  | -1.615271 | 3.636686  |
| H | 3.720843  | -1.400198 | 3.987365  |
| H | 2.062497  | -0.743578 | 3.819993  |

|   |           |           |           |
|---|-----------|-----------|-----------|
| H | 2.315103  | -2.465590 | 4.205961  |
| O | -3.317976 | 1.290762  | -0.403914 |
| C | -4.488428 | 0.835983  | -0.671990 |
| O | -4.802313 | -0.374812 | -0.712658 |
| C | -5.558462 | 1.898222  | -0.957144 |
| H | -5.671547 | 2.550443  | -0.083691 |
| H | -5.238033 | 2.534009  | -1.790013 |
| H | -6.517747 | 1.432063  | -1.194645 |

E (MP2)=-1711.4935853  
CPCM = -1707.34781

### Avidin Model:

|   |           |           |           |
|---|-----------|-----------|-----------|
| C | 0.000000  | 0.000000  | 0.000000  |
| C | 0.000000  | 0.000000  | 1.399078  |
| C | 1.200561  | 0.000000  | 2.110095  |
| C | 2.419679  | 0.001589  | 1.419337  |
| C | 2.429964  | 0.004284  | 0.017552  |
| C | 1.220591  | 0.001412  | -0.681296 |
| O | 3.569717  | -0.003787 | 2.156464  |
| O | 5.905465  | 0.062362  | 0.842297  |
| C | 6.481360  | 1.180539  | 0.698840  |
| N | 6.281174  | 2.262855  | 1.498585  |
| C | 7.130613  | 3.384572  | 1.131824  |
| C | 7.882663  | 2.841314  | -0.140672 |
| N | 7.383131  | 1.480264  | -0.254749 |
| C | 6.343174  | 4.653847  | 0.748121  |
| S | 5.901680  | 4.488723  | -1.025387 |
| C | 7.540649  | 3.728116  | -1.357250 |
| O | 4.754742  | 1.813683  | 3.931653  |
| C | 5.398576  | 1.138015  | 5.017822  |
| O | 7.141673  | -1.274893 | 3.078164  |
| C | 7.804320  | -2.485382 | 2.737928  |
| O | 8.427372  | -0.013722 | -2.316467 |
| C | 9.686492  | -0.004515 | -2.383570 |
| N | 10.426475 | -0.257865 | -3.440766 |
| N | 6.176516  | -1.852879 | -1.553538 |
| C | 5.382655  | -2.912416 | -1.809858 |
| O | 5.443511  | -3.644263 | -2.794176 |
| H | 7.716809  | 0.823511  | -0.990200 |
| H | 6.964104  | 5.544627  | 0.898598  |
| H | 5.432427  | 4.755488  | 1.342728  |
| H | 8.296232  | 4.511521  | -1.481216 |
| H | 7.491867  | 3.139786  | -2.275846 |
| H | 8.969950  | 2.833776  | 0.002553  |
| H | 7.828702  | 3.619254  | 1.945694  |
| H | 5.786646  | 2.187540  | 2.392879  |
| H | 6.050500  | -1.295164 | -0.713556 |
| H | 6.915750  | -1.569572 | -2.191327 |
| H | 4.628636  | -3.078118 | -1.013960 |
| H | 4.387350  | -0.006849 | 1.588424  |
| H | 6.714321  | -0.913722 | 2.280081  |
| H | 8.320377  | -2.836146 | 3.636548  |
| H | 7.100200  | -3.266133 | 2.416252  |
| H | 8.550098  | -2.339839 | 1.944252  |
| H | 1.211269  | -0.005583 | 3.195843  |
| H | 3.375664  | 0.008818  | -0.515915 |
| H | -0.940824 | -0.002370 | 1.943389  |
| H | 1.239304  | -0.000024 | -1.767559 |
| H | -0.936185 | -0.003077 | -0.550169 |
| H | 4.161101  | 1.184563  | 3.475833  |
| H | 4.668840  | 0.838027  | 5.781855  |
| H | 5.954873  | 0.257565  | 4.676155  |
| H | 6.095903  | 1.849592  | 5.468620  |
| H | 9.967337  | -0.469977 | -4.318913 |
| H | 11.511192 | -0.154863 | -3.431942 |
| H | 10.279925 | 0.241213  | -1.485772 |

|   |           |           |           |
|---|-----------|-----------|-----------|
| O | 12.806210 | -0.101173 | -5.627811 |
| C | 13.479037 | 0.054524  | -4.585761 |
| O | 13.023746 | 0.053396  | -3.384753 |
| C | 14.994714 | 0.292991  | -4.708555 |
| H | 15.212428 | 1.345012  | -4.484698 |
| H | 15.536373 | -0.313219 | -3.974211 |
| H | 15.344683 | 0.065059  | -5.718965 |

E(MP2) = -1880.93654

CPCM = -1876.307892



Avidin Model with Asp model removed:

|   |           |           |           |
|---|-----------|-----------|-----------|
| C | -4.144421 | -2.557362 | -2.884832 |
| C | -5.037077 | -1.986658 | -1.971046 |
| C | -4.567129 | -1.261244 | -0.875886 |
| C | -3.188857 | -1.100108 | -0.689139 |
| C | -2.286221 | -1.663811 | -1.600452 |
| C | -2.770706 | -2.390801 | -2.691156 |
| O | -2.772346 | -0.384688 | 0.401580  |
| O | -0.103719 | -0.146533 | 0.832578  |
| C | 0.445256  | 0.955777  | 0.566408  |
| N | -0.172049 | 2.159815  | 0.541844  |
| C | 0.729050  | 3.252422  | 0.212013  |
| C | 2.110523  | 2.517662  | 0.025132  |
| N | 1.759635  | 1.127966  | 0.272447  |
| C | 0.362341  | 3.977642  | -1.100352 |
| S | 1.158848  | 3.043838  | -2.464938 |
| C | 2.631070  | 2.780048  | -1.402917 |
| O | -2.927192 | 2.278314  | 1.288903  |
| C | -3.264405 | 2.380415  | 2.679032  |
| O | -0.849124 | -0.059343 | 3.651992  |
| C | -0.949968 | -1.341480 | 4.255866  |
| O | 3.954516  | -0.928063 | -0.042784 |
| C | 4.785096  | -1.835978 | -0.159317 |
| N | 6.099653  | -1.620132 | -0.369577 |
| N | 1.528143  | -2.685099 | 0.444308  |
| C | 1.806680  | -4.002280 | 0.446038  |
| O | 2.914533  | -4.483861 | 0.203027  |
| H | 2.426541  | 0.366634  | 0.227090  |
| H | 0.738380  | 5.006658  | -1.083523 |
| H | -0.718309 | 4.002273  | -1.256486 |
| H | 3.266445  | 3.672910  | -1.414364 |
| H | 3.209758  | 1.934607  | -1.781817 |
| H | 2.854073  | 2.858484  | 0.756030  |
| H | 0.764617  | 3.977354  | 1.034082  |
| H | -1.151376 | 2.280440  | 0.832689  |
| H | 0.619748  | -2.304160 | 0.671825  |
| H | 2.269940  | -2.018618 | 0.242174  |
| H | 0.938804  | -4.641517 | 0.687316  |
| H | -1.785561 | -0.358775 | 0.479814  |
| H | -0.577138 | -0.167318 | 2.723766  |
| H | -1.249853 | -1.187367 | 5.295950  |
| H | -1.708827 | -1.969529 | 3.767619  |
| H | 0.010007  | -1.877392 | 4.250969  |
| H | -5.252027 | -0.819876 | -0.158467 |
| H | -1.217933 | -1.528009 | -1.458396 |
| H | -6.107952 | -2.107582 | -2.109072 |
| H | -2.064691 | -2.824791 | -3.393728 |
| H | -4.514637 | -3.122101 | -3.734812 |
| H | -3.141448 | 1.378067  | 0.975747  |
| H | -4.342848 | 2.246527  | 2.830214  |
| H | -2.710789 | 1.649011  | 3.278844  |
| H | -2.994158 | 3.389812  | 2.999568  |
| H | 6.454728  | -0.676006 | -0.434164 |
| H | 6.741452  | -2.393654 | -0.455042 |
| H | 4.493071  | -2.897425 | -0.096700 |

E (MP2) = -1652.968828 CPCM = -1648.96215 (displacement convergence criteria not meet)

Ureido (-NH) hydrogen bonded to Acetate:

|   |           |           |           |
|---|-----------|-----------|-----------|
| C | 0.441235  | -0.430554 | 0.267043  |
| H | -0.366854 | -0.861160 | 0.869905  |
| C | 1.043201  | -1.544047 | -0.623458 |
| H | 0.595360  | -1.526362 | -1.618543 |
| H | 0.872845  | -2.528490 | -0.174788 |
| S | 2.856979  | -1.246825 | -0.770941 |
| C | 2.887961  | -0.568864 | 0.935916  |
| H | 2.947093  | -1.389752 | 1.661434  |
| H | 3.768128  | 0.068899  | 1.053602  |
| C | 1.579875  | 0.220978  | 1.128638  |
| H | 1.314941  | 0.219994  | 2.197028  |
| N | 1.639435  | 1.573638  | 0.596436  |
| H | 1.944742  | 2.333977  | 1.187036  |
| C | 0.505973  | 1.866849  | -0.191900 |
| O | 0.198588  | 3.006653  | -0.537063 |
| N | -0.107302 | 0.686959  | -0.485383 |
| H | -1.120073 | 0.622301  | -0.744845 |
| O | -2.826604 | 0.248838  | -0.910584 |
| C | -3.247000 | -0.447686 | 0.066792  |
| O | -2.557477 | -1.003545 | 0.963271  |
| C | -4.782786 | -0.596205 | 0.159883  |
| H | -5.207415 | 0.345464  | 0.530661  |
| H | -5.210366 | -0.776856 | -0.832347 |
| H | -5.061795 | -1.401385 | 0.846074  |

E (MP2) = -1004.601169

CPCM = -1002.681948

BSSE = 0.005925955024

Ureido (-NH) hydrogen bonded to methanol:

|   |           |           |           |
|---|-----------|-----------|-----------|
| C | 0.000000  | 0.000000  | 0.000000  |
| H | 0.000000  | 0.000000  | 1.098978  |
| H | 1.034348  | 0.000000  | -0.363643 |
| H | -0.497642 | 0.911661  | -0.343290 |
| O | -0.747976 | -1.104437 | -0.516028 |
| H | -0.302045 | -1.934401 | -0.254818 |
| H | -0.646460 | -1.467111 | -2.406424 |
| N | -0.463417 | -1.772977 | -3.360643 |
| C | -1.290906 | -1.490129 | -4.514734 |
| H | -1.224351 | -0.428686 | -4.786587 |
| C | 0.467493  | -2.760123 | -3.567683 |
| O | 1.266515  | -3.196595 | -2.744070 |
| N | 0.335591  | -3.168598 | -4.883704 |
| C | -0.645946 | -2.401661 | -5.630642 |
| H | -0.167210 | -1.794644 | -6.411050 |
| H | 1.091169  | -3.673364 | -5.320059 |
| C | -1.751892 | -3.272247 | -6.259105 |
| S | -2.979315 | -3.597495 | -4.936666 |
| C | -2.782359 | -1.868388 | -4.351292 |
| H | -3.103670 | -1.799483 | -3.309528 |
| H | -3.409281 | -1.201116 | -4.953442 |
| H | -2.228606 | -2.741565 | -7.091547 |
| H | -1.357791 | -4.221338 | -6.630054 |

E (MP2) = -892.0576987  
CPCM = -890.399068  
BSSE = 0.003614347540

Ureido (O=) hydrogen bonded to methanol:

|   |           |           |          |
|---|-----------|-----------|----------|
| H | 0.000000  | 0.000000  | 0.000000 |
| C | 0.000000  | 0.000000  | 1.098590 |
| H | 1.038076  | 0.000000  | 1.445925 |
| H | -0.483557 | 0.924920  | 1.442467 |
| O | -0.622845 | -1.160350 | 1.634138 |
| H | -1.558210 | -1.169192 | 1.354458 |
| O | -3.390354 | -1.339152 | 0.967380 |
| C | -4.117207 | -2.211693 | 1.438211 |
| N | -4.214720 | -3.515833 | 1.008460 |
| H | -3.488257 | -3.882412 | 0.412235 |
| N | -5.002152 | -2.065742 | 2.478814 |
| H | -4.972225 | -1.228866 | 3.040023 |
| C | -5.593369 | -3.316186 | 2.925374 |
| H | -5.270083 | -3.555404 | 3.946507 |
| C | -5.016479 | -4.355261 | 1.886225 |
| H | -4.390706 | -5.107257 | 2.383610 |
| C | -6.191554 | -5.051415 | 1.170584 |
| C | -7.134547 | -3.340428 | 2.855920 |
| H | -7.563165 | -2.356670 | 3.059999 |
| H | -7.534141 | -4.054036 | 3.585162 |
| H | -6.479238 | -5.960973 | 1.709974 |
| H | -5.934870 | -5.321375 | 0.143782 |
| S | -7.588351 | -3.862448 | 1.156832 |

E (MP2) = -892.0562451  
CPCM = -890.403787  
BSSE = 0.002720705633

### Ureido (O=) hydrogen bonded to formamide

|   |           |           |          |
|---|-----------|-----------|----------|
| O | 0.000000  | 0.000000  | 0.000000 |
| C | 0.000000  | 0.000000  | 1.232012 |
| H | 0.952615  | 0.000000  | 1.801395 |
| N | -1.078680 | 0.002317  | 2.032876 |
| H | -2.040352 | -0.005849 | 1.682517 |
| H | -0.977314 | -0.001005 | 3.043725 |
| O | -0.776124 | -0.487682 | 4.910529 |
| C | -0.736836 | -1.689876 | 5.174890 |
| N | -0.906860 | -2.732708 | 4.296960 |
| H | -0.948856 | -2.559734 | 3.303760 |
| N | -0.554509 | -2.243687 | 6.418305 |
| H | -0.273024 | -1.657349 | 7.188533 |
| C | -0.411792 | -3.690630 | 6.402155 |
| C | -0.675486 | -4.041667 | 4.885728 |
| H | -1.563035 | -4.675716 | 4.772701 |
| H | -1.160668 | -4.156489 | 7.053651 |
| C | 0.559653  | -4.776712 | 4.323395 |
| H | 0.705703  | -4.579764 | 3.258521 |
| H | 0.449372  | -5.858121 | 4.461144 |
| S | 2.012755  | -4.171610 | 5.265023 |
| C | 0.995266  | -4.193757 | 6.790854 |
| H | 0.934069  | -5.214738 | 7.183979 |
| H | 1.461777  | -3.561780 | 7.550699 |

E (MP2) = -946.1011164

CPCM = -944.301694

BSSE = 0.002968673615

Ureido (O=) hydrogen bonded to phenol:

|   |           |           |           |
|---|-----------|-----------|-----------|
| C | 0.000000  | 0.000000  | 0.000000  |
| C | 0.000000  | 0.000000  | 1.398340  |
| C | 1.222639  | 0.000000  | -0.680317 |
| H | 1.240703  | 0.001068  | -1.767369 |
| H | -0.936410 | 0.000621  | -0.550224 |
| H | -0.940012 | -0.000673 | 1.943487  |
| C | 2.427727  | 0.000964  | 0.023006  |
| H | 3.381631  | 0.005172  | -0.495912 |
| C | 1.198157  | -0.000753 | 2.115451  |
| H | 1.194199  | -0.004970 | 3.201073  |
| C | 2.419895  | 0.000693  | 1.425407  |
| O | 3.618931  | 0.006448  | 2.071164  |
| H | 3.520853  | 0.004785  | 3.070616  |
| O | 3.495579  | -0.152480 | 4.767361  |
| C | 4.061579  | -1.201234 | 5.099444  |
| N | 5.047991  | -1.847533 | 4.396427  |
| H | 5.173747  | -1.633005 | 3.415728  |
| N | 3.859586  | -1.899731 | 6.256493  |
| C | 4.698822  | -3.079569 | 6.385852  |
| C | 5.435588  | -3.118059 | 4.991393  |
| H | 3.278687  | -1.523942 | 6.989090  |
| H | 5.411633  | -2.961829 | 7.212002  |
| H | 6.523125  | -3.155949 | 5.119254  |
| C | 4.971388  | -4.369534 | 4.207906  |
| H | 4.867343  | -4.165049 | 3.139651  |
| H | 5.696755  | -5.180312 | 4.335028  |
| S | 3.342729  | -4.878970 | 4.886449  |
| C | 3.902806  | -4.385827 | 6.560217  |
| H | 3.035884  | -4.252982 | 7.212301  |
| H | 4.544079  | -5.162926 | 6.991609  |

E (MP2) = -1083.23178  
CPCM = -1080.933243  
BSSE = 0.004987026562

Ureido (-NH) hydrogen bonded to formamide-acetate:

|   |           |           |           |
|---|-----------|-----------|-----------|
| H | -8.204637 | -1.104451 | 0.561382  |
| C | -7.738168 | -0.145784 | 0.318386  |
| H | -8.165209 | 0.252531  | -0.609219 |
| H | -7.960233 | 0.578320  | 1.111783  |
| C | -6.209610 | -0.292805 | 0.172370  |
| O | -5.596056 | 0.762355  | -0.208406 |
| O | -5.689206 | -1.402973 | 0.437303  |
| H | -2.871560 | -0.915620 | -0.010643 |
| N | -3.005596 | 0.055484  | -0.264902 |
| H | -4.012284 | 0.399038  | -0.269107 |
| H | -2.209709 | 1.851959  | -0.783712 |
| C | -1.949007 | 0.809760  | -0.527939 |
| O | -0.752914 | 0.447030  | -0.509217 |
| H | 1.010763  | 1.158316  | -0.435441 |
| N | 1.961238  | 0.941555  | -0.127872 |
| C | 2.971748  | 1.852249  | -0.037890 |
| O | 2.988589  | 3.014426  | -0.432268 |
| N | 4.046470  | 1.208378  | 0.592188  |
| C | 3.660567  | -0.068188 | 1.173517  |
| C | 2.209255  | -0.284112 | 0.602315  |
| H | 4.710661  | 1.809662  | 1.056457  |
| H | 3.649878  | -0.019129 | 2.271959  |
| H | 1.468901  | -0.403323 | 1.402323  |
| C | 4.555699  | -1.241252 | 0.726484  |
| S | 3.898619  | -1.828117 | -0.883986 |
| C | 2.184950  | -1.552549 | -0.277590 |
| H | 1.503692  | -1.425435 | -1.120138 |
| H | 1.859682  | -2.418668 | 0.309005  |
| H | 4.515828  | -2.052613 | 1.463663  |
| H | 5.595621  | -0.929248 | 0.602351  |

MP2 = -1174.059644

CPCM = -1171.648135

BSSE = 0.003232258776

Ureido (-NH) hydrogen bonded to formamide:

|   |           |           |           |
|---|-----------|-----------|-----------|
| N | 0.000000  | 0.000000  | 0.000000  |
| H | 0.000000  | 0.000000  | 1.008735  |
| H | 0.882593  | 0.000000  | -0.492598 |
| C | -1.159498 | 0.012358  | -0.688668 |
| H | -2.069396 | 0.018180  | -0.065835 |
| O | -1.219982 | 0.017068  | -1.923201 |
| H | -3.122810 | -0.033015 | -2.357613 |
| N | -4.026243 | -0.116877 | -2.818528 |
| C | -4.216057 | -0.055333 | -4.250426 |
| H | -3.690476 | 0.810648  | -4.675151 |
| C | -3.766593 | -1.330046 | -4.999968 |
| H | -2.923089 | -1.807181 | -4.496741 |
| H | -3.472760 | -1.087319 | -6.027219 |
| S | -5.177288 | -2.507335 | -5.014051 |
| C | -6.343385 | -1.115768 | -5.270463 |
| H | -7.348710 | -1.425649 | -4.976905 |
| H | -6.357298 | -0.833336 | -6.329834 |
| C | -5.781566 | 0.105781  | -4.341360 |
| H | -6.052854 | 1.064345  | -4.804100 |
| N | -6.182566 | 0.061836  | -2.942824 |
| H | -7.050989 | 0.459211  | -2.619003 |
| C | -5.179537 | 0.072966  | -2.103674 |
| O | -5.277805 | 0.213236  | -0.887583 |

E(MP2) = -946.1018174  
CPCM = -944.30176  
BSSE = 0.003209254417



Ureido conjugate base:

|   |           |           |          |
|---|-----------|-----------|----------|
| O | 0.000000  | 0.000000  | 0.000000 |
| C | 0.000000  | 0.000000  | 1.270458 |
| N | 1.119492  | 0.000000  | 2.040716 |
| C | 0.811504  | 0.081098  | 3.462713 |
| C | -0.760225 | 0.041068  | 3.479379 |
| N | -1.089805 | 0.002308  | 2.055688 |
| C | 1.359181  | -1.111040 | 4.273321 |
| S | 0.118276  | -2.456745 | 4.138628 |
| C | -1.230707 | -1.209754 | 4.246799 |
| H | 1.485159  | -0.824787 | 5.323751 |
| H | 2.320116  | -1.456598 | 3.884644 |
| H | -1.428587 | -0.949427 | 5.290076 |
| H | -2.145254 | -1.621428 | 3.815949 |
| H | -1.210193 | 0.917562  | 3.953922 |
| H | 1.196442  | 1.018486  | 3.884081 |
| H | 2.044206  | 0.177251  | 1.641888 |

Ureido:

|   |           |           |          |
|---|-----------|-----------|----------|
| O | 0.000000  | 0.000000  | 0.000000 |
| C | 0.000000  | 0.000000  | 1.270458 |
| N | 1.119492  | 0.000000  | 2.040716 |
| C | 0.811504  | 0.081098  | 3.462713 |
| C | -0.760225 | 0.041068  | 3.479379 |
| N | -1.089805 | 0.002308  | 2.055688 |
| C | 1.359181  | -1.111040 | 4.273321 |
| S | 0.118276  | -2.456745 | 4.138628 |
| C | -1.230707 | -1.209754 | 4.246799 |
| H | -2.054225 | 0.076631  | 1.709766 |
| H | 1.485159  | -0.824787 | 5.323751 |
| H | 2.320116  | -1.456598 | 3.884644 |
| H | -1.428587 | -0.949427 | 5.290076 |
| H | -2.145254 | -1.621428 | 3.815949 |
| H | -1.210193 | 0.917562  | 3.953922 |
| H | 1.196442  | 1.018486  | 3.884081 |
| H | 2.044206  | 0.177251  | 1.641888 |

E (MP2) = -776.6503501  
CPCM = -775.344837

Ureido hydrogen bonded to four water molecules:

|   |           |           |           |
|---|-----------|-----------|-----------|
| C | 0.043048  | 0.462023  | 0.619425  |
| O | 0.054285  | 0.227837  | 1.854306  |
| N | 1.139534  | 0.553680  | -0.174931 |
| N | -1.065030 | 0.684869  | -0.132390 |
| C | 0.809971  | 0.796650  | -1.569259 |
| C | -0.762062 | 0.897855  | -1.538095 |
| C | -1.352318 | -0.182320 | -2.469800 |
| S | -0.149718 | -1.567606 | -2.509447 |
| C | 1.225428  | -0.352046 | -2.512309 |
| H | -2.013467 | 0.655439  | 0.250935  |
| H | 2.092349  | 0.407558  | 0.168883  |
| H | 1.268102  | 1.732437  | -1.912708 |
| H | -1.111198 | 1.886887  | -1.859331 |
| H | 2.143195  | -0.838225 | -2.174030 |
| H | 1.383465  | 0.028638  | -3.527607 |
| H | -2.316127 | -0.545365 | -2.106065 |
| H | -1.490501 | 0.222294  | -3.478768 |
| O | 2.295282  | -0.726690 | 3.087820  |
| H | 2.133583  | -1.634401 | 3.370770  |
| H | 1.445663  | -0.394330 | 2.706875  |
| O | -2.196810 | 0.388076  | 3.378196  |
| H | -1.338459 | 0.354382  | 2.888075  |
| H | -2.108653 | 1.072609  | 4.051557  |
| O | -3.690828 | 0.573606  | 1.122747  |
| H | -4.309815 | -0.161432 | 1.043109  |
| H | -3.325480 | 0.529936  | 2.038616  |
| O | 3.758426  | -0.063262 | 0.904495  |
| H | 3.399386  | -0.381311 | 1.767750  |
| H | 4.474677  | 0.547219  | 1.114054  |

E (MP2) = -1081.6619831  
CPCM = -1079.527191

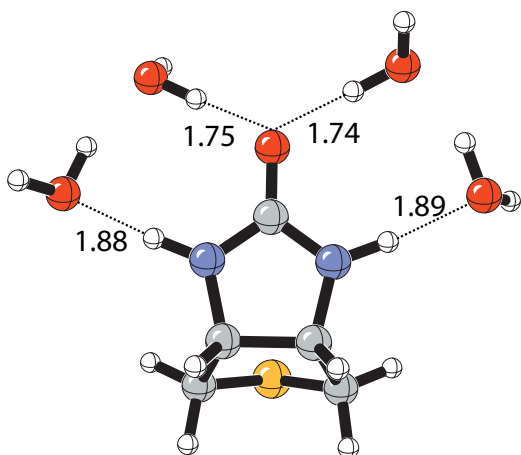

## Apostreptavidin model with four bound water molecules

|   |           |           |           |
|---|-----------|-----------|-----------|
| C | 0.000000  | 0.000000  | 0.000000  |
| C | 4.419417  | 0.000000  | 0.000000  |
| C | 6.215850  | 3.288198  | 0.000000  |
| C | 3.401465  | 5.284082  | 2.043962  |
| C | 3.244726  | 5.368960  | 3.432709  |
| C | 3.593660  | 6.535541  | 4.100553  |
| C | 4.117869  | 7.641734  | 3.427710  |
| C | 4.268429  | 7.540469  | 2.033782  |
| C | 3.921909  | 6.375551  | 1.336762  |
| O | 3.063147  | 4.146291  | 1.377885  |
| O | 5.946935  | 3.852355  | -1.285697 |
| O | 5.517690  | 0.030145  | -0.564923 |
| N | 3.437948  | 0.832477  | -0.392437 |
| O | 0.088232  | 1.272392  | 0.117445  |
| C | -0.765058 | -0.760454 | 1.081351  |
| O | 0.558957  | -0.631224 | -0.935073 |
| O | 1.258816  | 0.746029  | -3.340474 |
| O | 0.643257  | 3.075017  | -1.687335 |
| O | 3.308697  | 2.745546  | -2.614772 |
| H | 2.961501  | 2.000427  | -3.141572 |
| H | 2.488157  | 3.103730  | -2.216234 |
| H | 0.205703  | 3.870449  | -1.364614 |
| H | 0.453562  | 2.355067  | -1.001063 |
| H | 0.728110  | 1.537189  | -3.157342 |
| H | 1.094385  | 0.184146  | -2.547606 |
| H | -0.780601 | -1.831244 | 0.867451  |
| H | -1.789958 | -0.379126 | 1.148224  |
| H | -0.292634 | -0.585591 | 2.054613  |
| H | 4.170351  | -0.686971 | 0.828460  |
| H | 2.471109  | 0.690212  | -0.120892 |
| H | 3.599634  | 1.446633  | -1.190395 |
| H | 5.184119  | 3.401362  | -1.685732 |
| H | 6.436322  | 2.216843  | -0.067385 |
| H | 5.377335  | 3.438813  | 0.690689  |
| H | 7.094047  | 3.813125  | 0.390962  |
| H | 2.634531  | 3.503210  | 1.957151  |
| H | 2.844982  | 4.520769  | 3.984094  |
| H | 3.460596  | 6.578231  | 5.179664  |
| H | 4.392071  | 8.547307  | 3.958463  |
| H | 4.674656  | 8.377845  | 1.471938  |
| H | 4.062211  | 6.293842  | 0.263960  |

E (MP2) = -1048.1240282  
CPCM = -1045.056771

Apoavidin model with three bound water molecules

|   |           |           |           |
|---|-----------|-----------|-----------|
| C | 0.000000  | 0.000000  | 0.000000  |
| C | 0.000000  | 0.000000  | 4.113332  |
| C | 3.306085  | 0.000000  | 5.674346  |
| C | 4.524906  | 3.166344  | 3.505842  |
| C | 5.650288  | 2.607047  | 4.135608  |
| C | 6.637300  | 3.444582  | 4.654454  |
| C | 6.480752  | 4.833746  | 4.602645  |
| C | 5.359463  | 5.385074  | 3.969756  |
| C | 4.381847  | 4.554907  | 3.411287  |
| O | 4.299238  | -0.939237 | 5.246435  |
| O | -0.301479 | 1.051400  | 3.574396  |
| N | 0.895621  | -0.842564 | 3.515372  |
| C | -0.889232 | 1.240584  | -0.194635 |
| O | 1.229181  | -0.018720 | -0.231727 |
| N | -0.621319 | -1.112009 | 0.389931  |
| O | -3.224337 | -1.471251 | 0.928150  |
| O | -2.306200 | -3.395795 | 1.676327  |
| C | -3.276158 | -2.620794 | 1.483456  |
| C | -4.667225 | -3.097521 | 1.944775  |
| O | 3.583012  | 2.346296  | 2.969272  |
| O | 3.785024  | -0.339574 | 2.590460  |
| O | 3.528284  | -1.290663 | 0.067561  |
| H | 2.660079  | -0.831782 | -0.100784 |
| H | 3.364552  | -2.232019 | -0.059794 |
| H | 3.841412  | -0.704812 | 1.670701  |
| H | 2.842623  | -0.399291 | 2.829418  |
| H | 3.895592  | 1.424789  | 2.827694  |
| H | 5.748635  | 1.527224  | 4.198653  |
| H | 7.512693  | 3.011651  | 5.131746  |
| H | 7.240765  | 5.484791  | 5.026260  |
| H | 5.244248  | 6.464044  | 3.907796  |
| H | 3.510583  | 4.959590  | 2.906180  |
| H | 3.673984  | 0.478807  | 6.588639  |
| H | 3.111701  | 0.779647  | 4.933580  |
| H | 2.359824  | -0.504729 | 5.911077  |
| H | 4.307421  | -0.939445 | 4.272611  |
| H | 0.802621  | -0.804688 | 2.500486  |
| H | 0.905678  | -1.797337 | 3.861532  |
| H | -0.347697 | -0.301281 | 5.117120  |
| H | -0.791103 | 1.573968  | -1.232258 |
| H | -0.527920 | 2.039529  | 0.458983  |
| H | -1.931649 | 1.015690  | 0.035133  |
| H | -0.092406 | -1.972857 | 0.437059  |
| H | -1.660081 | -1.199853 | 0.596781  |
| H | -5.365018 | -3.080703 | 1.098978  |
| H | -5.063918 | -2.407396 | 2.699195  |
| H | -4.614427 | -4.106348 | 2.360946  |

E (MP2) =

CPCM = -1177.010310

### *MPWB1K Geometries and ab initio and CPCM energies*

Cartesian coordinates and distances are reported in Ångstroms. MP2 electronic energies and CPCM solvation energies are reported in Hartrees.

Streptavidin model:

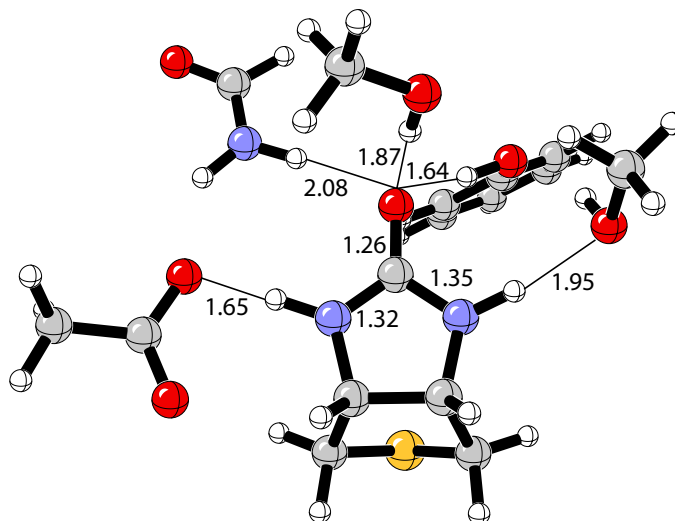

Frequency analysis gave one small imaginary frequency (-19 cm<sup>-1</sup>) corresponding to out-of-plane bending motion of the phenol-ureido hydrogen bond.

Streptavidin model:

|   |           |           |           |
|---|-----------|-----------|-----------|
| C | -2.127254 | -2.097477 | 0.102437  |
| C | -0.894174 | -2.925026 | 0.626185  |
| N | 0.123103  | -1.899247 | 0.795824  |
| C | -0.370430 | -0.649737 | 0.540678  |
| N | -1.631219 | -0.728865 | 0.105149  |
| O | 0.299057  | 0.420088  | 0.705914  |
| H | -2.271715 | 0.096271  | -0.104850 |
| C | -0.517690 | -3.992354 | -0.422560 |
| H | -1.056192 | -4.926432 | -0.221284 |
| H | 0.555562  | -4.197518 | -0.419895 |
| C | -2.527085 | -2.605896 | -1.296048 |
| H | -3.299343 | -3.377408 | -1.209382 |
| H | -2.925678 | -1.793989 | -1.903780 |
| S | -1.016067 | -3.324555 | -2.058498 |
| H | -2.999857 | -2.172201 | 0.758857  |
| H | -1.109187 | -3.415910 | 1.585059  |
| H | 0.972027  | -2.030656 | 1.348004  |
| H | -0.512023 | 2.282513  | 0.150362  |
| N | -1.122898 | 3.054121  | -0.101688 |
| H | -2.095059 | 2.804192  | -0.301975 |
| C | -0.651969 | 4.310158  | -0.176058 |
| O | -1.293959 | 5.318805  | -0.473243 |
| H | 0.428728  | 4.374487  | 0.068153  |

|   |           |           |           |
|---|-----------|-----------|-----------|
| H | 1.926819  | 0.376615  | 0.599033  |
| H | 0.304921  | 0.917618  | 2.538330  |
| O | 2.926365  | 0.288347  | 0.639844  |
| O | 0.314539  | 1.062792  | 3.503720  |
| C | -0.794056 | 1.882521  | 3.850510  |
| H | -0.771322 | 2.015418  | 4.936815  |
| H | -0.740952 | 2.872419  | 3.377034  |
| H | -1.752199 | 1.420441  | 3.574897  |
| C | 3.528170  | 0.575443  | -0.547650 |
| C | 4.926108  | 0.486211  | -0.615479 |
| C | 2.798215  | 0.956105  | -1.683941 |
| C | 5.585412  | 0.775887  | -1.810596 |
| H | 5.476462  | 0.193260  | 0.273630  |
| C | 3.471652  | 1.244652  | -2.872663 |
| H | 1.715831  | 1.020850  | -1.630467 |
| C | 4.865245  | 1.157526  | -2.947871 |
| H | 6.669480  | 0.704213  | -1.851449 |
| H | 2.895898  | 1.538794  | -3.746044 |
| H | 5.381380  | 1.383673  | -3.876351 |
| O | 2.701083  | -1.989724 | 2.263574  |
| H | 3.005446  | -1.231706 | 1.726280  |
| C | 2.698489  | -1.603968 | 3.640762  |
| H | 3.716122  | -1.384726 | 3.993068  |
| H | 2.055880  | -0.734196 | 3.821491  |
| H | 2.313828  | -2.454835 | 4.210573  |
| O | -3.320354 | 1.286756  | -0.405398 |
| C | -4.489988 | 0.829566  | -0.673048 |
| O | -4.801812 | -0.381797 | -0.711975 |
| C | -5.562159 | 1.889533  | -0.958635 |
| H | -5.685503 | 2.533322  | -0.080264 |
| H | -5.237951 | 2.534168  | -1.783117 |
| H | -6.517510 | 1.421150  | -1.207397 |

E (MP2) = -1711.489104

CPCM = -1707.356822

(Displacement convergence criteria not meet)

imaginary frequency -19.0  $\text{cm}^{-1}$

Ureido (O=) hydrogen bonded to phenol:

|   |           |           |           |
|---|-----------|-----------|-----------|
| H | -4.972462 | 2.374102  | -0.752877 |
| C | -4.371233 | 1.522377  | -0.474850 |
| C | -3.238755 | 1.194861  | -1.202153 |
| H | -2.949742 | 1.792693  | -2.053303 |
| C | -2.460813 | 0.105500  | -0.853741 |
| H | -1.576380 | -0.145891 | -1.419231 |
| C | -4.721119 | 0.740081  | 0.614386  |
| H | -5.601616 | 0.980386  | 1.192029  |
| C | -3.953489 | -0.352246 | 0.973540  |
| H | -4.218427 | -0.970042 | 1.817652  |
| C | -2.818884 | -0.672751 | 0.240264  |
| O | -2.097908 | -1.741614 | 0.621774  |
| H | -1.309279 | -1.879867 | 0.043467  |
| O | 0.178302  | -2.066711 | -0.851195 |
| C | 1.170661  | -1.472588 | -0.462585 |
| N | 1.453488  | -1.129602 | 0.817716  |
| H | 0.822598  | -1.367787 | 1.556920  |
| C | 2.742887  | -0.520283 | 1.001814  |
| H | 3.383834  | -1.141090 | 1.626793  |
| C | 2.653991  | 0.892427  | 1.565065  |
| H | 1.885695  | 0.972654  | 2.327766  |
| H | 3.606936  | 1.186976  | 2.002105  |
| S | 2.252665  | 1.955598  | 0.170524  |
| C | 3.454437  | 1.042648  | -0.806345 |
| H | 4.464255  | 1.360440  | -0.550425 |
| H | 3.294411  | 1.228111  | -1.863986 |
| C | 3.261834  | -0.432039 | -0.457951 |
| H | 4.197833  | -0.958062 | -0.620852 |
| N | 2.213023  | -1.057861 | -1.214884 |
| H | 2.303877  | -1.231280 | -2.243572 |

E (MP2) = -1083.228237

CPCM = -1080.935923

Imaginary frequency -17.7 cm<sup>-1</sup>

(bending motion of the residue to form an additon hydrogen bond to adjacent -NH group of ureido)



Ureido (O=) hydrogen bonded to formamide:

|   |           |           |           |
|---|-----------|-----------|-----------|
| O | -4.597535 | -1.389281 | -0.025149 |
| C | -3.687007 | -0.654128 | -0.359546 |
| H | -2.958144 | -0.969883 | -1.122093 |
| N | -3.440905 | 0.565573  | 0.108216  |
| H | -4.009936 | 1.010694  | 0.817744  |
| H | -2.660508 | 1.100593  | -0.235848 |
| O | -0.979238 | 1.909226  | -0.651076 |
| C | -0.022804 | 1.402779  | -0.093632 |
| N | -0.055433 | 0.488694  | 0.908501  |
| H | -0.922946 | 0.086032  | 1.203279  |
| N | 1.283697  | 1.682381  | -0.325860 |
| H | 1.538948  | 2.235949  | -1.118118 |
| C | 2.193052  | 0.836136  | 0.392986  |
| C | 1.236350  | -0.013938 | 1.277485  |
| H | 1.425302  | 0.142643  | 2.338277  |
| H | 2.877454  | 1.429049  | 0.997684  |
| C | 1.436270  | -1.482508 | 0.917314  |
| S | 1.881807  | -1.507485 | -0.825911 |
| C | 2.975166  | -0.114005 | -0.508269 |
| H | 3.878296  | -0.455331 | -0.004743 |
| H | 3.263992  | 0.357805  | -1.442610 |
| H | 2.238948  | -1.913292 | 1.513756  |
| H | 0.536184  | -2.066609 | 1.083021  |

E (MP2) = -946.0995113

CPCM = -944.305015

Imaginary frequency -36.0 cm<sup>-1</sup>

(bending motion of the residue to form an additon hydrogen bond to adjacent -NH group of ureido)

Ureido (O=) hydrogen bonded to methanol:

|   |           |           |           |
|---|-----------|-----------|-----------|
| C | 5.068966  | 0.312892  | 0.122141  |
| H | 5.535476  | 0.053973  | -0.829609 |
| H | 4.809767  | 1.372422  | 0.096554  |
| H | 5.799727  | 0.158750  | 0.912107  |
| O | 3.963503  | -0.494882 | 0.406974  |
| H | 3.274623  | -0.324777 | -0.245831 |
| O | 1.690884  | 0.035727  | -1.223156 |
| C | 0.697899  | 0.016932  | -0.520598 |
| N | 0.062842  | 1.090554  | 0.010085  |
| H | 0.454583  | 2.004405  | -0.088367 |
| C | -1.002712 | 0.754109  | 0.907933  |
| H | -0.791751 | 1.112030  | 1.915194  |
| C | -2.365728 | 1.260839  | 0.448297  |
| H | -2.291242 | 2.232886  | -0.028923 |
| H | -3.044302 | 1.342795  | 1.296056  |
| S | -2.984976 | 0.043440  | -0.722950 |
| C | -2.392460 | -1.249330 | 0.378835  |
| H | -3.065900 | -1.356058 | 1.227981  |
| H | -2.347012 | -2.196756 | -0.148649 |
| C | -1.012984 | -0.801303 | 0.845617  |
| H | -0.781060 | -1.241457 | 1.815003  |
| N | 0.018727  | -1.084912 | -0.110423 |
| H | 0.442754  | -1.984343 | -0.215852 |

E (MP2) = -892.0546433

CPCM = -890.405945

Imaginary frequency -16.2 cm<sup>-1</sup>

(bending motion of the residue to form an additon hydrogen bond to adjacent -NH group of ureido)

Ureido (-NH) hydrogen bonded to methanol:

|   |           |           |           |
|---|-----------|-----------|-----------|
| C | 4.011267  | -0.387425 | 0.269266  |
| H | 3.765624  | 0.672387  | 0.216210  |
| H | 5.002076  | -0.547117 | -0.158865 |
| H | 4.042442  | -0.684985 | 1.313553  |
| H | 2.966078  | -0.913850 | -1.286525 |
| O | 3.044477  | -1.188906 | -0.365302 |
| H | 1.439253  | -0.365650 | 0.293383  |
| N | 0.663494  | 0.221290  | 0.564798  |
| C | 0.470531  | 1.337484  | -0.187291 |
| O | 1.279829  | 1.851107  | -0.930517 |
| N | -0.788749 | 1.791090  | 0.087392  |
| C | -1.580549 | 0.839405  | 0.813427  |
| C | -0.542885 | -0.268535 | 1.162828  |
| C | -1.024003 | -1.582136 | 0.555326  |
| S | -1.918186 | -1.136334 | -0.941900 |
| C | -2.689161 | 0.203882  | -0.019549 |
| H | -3.143899 | 0.914913  | -0.703147 |
| H | -3.469541 | -0.193007 | 0.628157  |
| H | -0.194753 | -2.240788 | 0.315639  |
| H | -1.689152 | -2.101558 | 1.243610  |
| H | -0.426897 | -0.379891 | 2.240207  |
| H | -2.002502 | 1.289380  | 1.710978  |
| H | -1.186610 | 2.491194  | -0.505623 |

E (MP2) = -1004.598532  
CPCM = -1002.687172

Ureido (-NH) hydrogen bonded to acetate:

|   |           |           |           |
|---|-----------|-----------|-----------|
| C | 0.409030  | -0.159308 | 0.721099  |
| H | -0.205385 | -0.285183 | 1.607282  |
| C | 0.173856  | -1.367617 | -0.181053 |
| H | -0.608121 | -1.144234 | -0.898670 |
| H | -0.139656 | -2.225022 | 0.408638  |
| S | 1.740104  | -1.714337 | -1.014924 |
| C | 2.625818  | -1.267085 | 0.487953  |
| H | 2.573724  | -2.080899 | 1.211753  |
| H | 3.669285  | -1.066667 | 0.260592  |
| C | 1.920424  | -0.031280 | 1.030673  |
| H | 2.101907  | 0.058480  | 2.104543  |
| N | 2.284070  | 1.166257  | 0.328964  |
| H | 3.063075  | 1.722457  | 0.618887  |
| C | 1.174271  | 1.862686  | -0.130134 |
| O | 1.230883  | 2.977253  | -0.617157 |
| N | 0.102939  | 1.086617  | 0.084913  |
| H | -0.846883 | 1.225437  | -0.278773 |
| O | -2.532159 | 0.737136  | -0.690044 |
| C | -3.097304 | -0.066575 | 0.090923  |
| O | -2.564222 | -0.724275 | 1.002035  |
| C | -4.597253 | -0.244475 | -0.128799 |
| H | -5.093470 | 0.719496  | -0.034335 |
| H | -4.774774 | -0.595755 | -1.143589 |
| H | -5.019495 | -0.947829 | 0.582683  |

E (MP2) = -1004.599106

CPCM = -1002.686586

## Apostreptavidin-7H<sub>2</sub>O Complex:

|   |           |           |           |
|---|-----------|-----------|-----------|
| C | -6.134529 | 1.083653  | -1.814417 |
| C | -2.894031 | -0.550009 | 2.728760  |
| C | 1.251507  | -0.581626 | 2.634561  |
| C | 2.001647  | 2.182227  | -0.086817 |
| C | 5.889909  | -2.035601 | 1.362847  |
| O | 5.832631  | -1.062703 | 0.314854  |
| C | 3.292553  | 1.684246  | 0.170108  |
| C | 4.355347  | 2.560202  | 0.371678  |
| C | 4.141824  | 3.940416  | 0.343391  |
| C | 2.856014  | 4.437538  | 0.103346  |
| C | 1.780402  | 3.567357  | -0.114112 |
| O | 0.987772  | 1.312157  | -0.317285 |
| O | 1.724891  | -1.743191 | 1.946272  |
| N | -2.576575 | -0.490099 | 1.416409  |
| O | -2.266153 | -1.325445 | 3.459393  |
| C | -5.550831 | 0.304594  | -0.655570 |
| O | -6.304785 | -0.209589 | 0.198155  |
| O | -4.266590 | 0.173902  | -0.629878 |
| O | -1.936854 | 1.077467  | -1.878104 |
| O | -3.373303 | -2.366584 | -1.276948 |
| O | -0.894379 | -1.458650 | -2.280525 |
| O | 1.314086  | -1.283393 | -0.862499 |
| O | 4.015187  | -2.220558 | -1.450162 |
| O | 6.737679  | -2.105899 | -2.172480 |
| O | -9.027556 | 0.093437  | 0.363670  |
| H | -9.178120 | -0.097071 | 1.296481  |
| H | -8.051211 | -0.016978 | 0.247295  |
| H | -3.598978 | -2.937091 | -0.532539 |
| H | -3.770974 | -1.489101 | -1.056977 |
| H | -1.349837 | 1.396276  | -1.176215 |
| H | -2.815531 | 0.898683  | -1.466876 |
| H | -1.654733 | -1.980418 | -1.949159 |
| H | -1.237326 | -0.532552 | -2.281380 |
| H | 0.487922  | -1.431406 | -1.418624 |
| H | 2.094314  | -1.540783 | -1.380935 |
| H | 4.434597  | -1.690894 | -0.731616 |
| H | 3.730875  | -3.045274 | -1.033229 |
| H | 6.996752  | -1.620888 | -2.964750 |
| H | 5.773535  | -2.260132 | -2.242362 |
| H | 6.494999  | -1.277092 | -0.368459 |
| H | 5.901454  | -3.059843 | 0.966479  |
| H | 4.994764  | -1.901573 | 1.974058  |
| H | 6.779493  | -1.890726 | 1.988636  |
| H | 5.346154  | 2.156611  | 0.561306  |
| H | 4.968553  | 4.626671  | 0.505873  |
| H | 2.683210  | 5.510419  | 0.079721  |
| H | 0.781232  | 3.941281  | -0.314494 |
| H | 3.457977  | 0.612361  | 0.205902  |
| H | 1.279508  | 0.380209  | -0.480865 |
| H | 1.455997  | -1.679043 | 1.012157  |
| H | 1.631223  | -0.644528 | 3.658825  |
| H | 1.621666  | 0.345751  | 2.181732  |
| H | 0.157362  | -0.555705 | 2.682867  |
| H | -3.705623 | 0.113770  | 3.065887  |

|   |           |           |           |
|---|-----------|-----------|-----------|
| H | -1.903504 | -1.177941 | 1.105960  |
| H | -3.253281 | -0.131402 | 0.728196  |
| H | -5.577781 | 2.013270  | -1.969726 |
| H | -7.192923 | 1.301042  | -1.657100 |
| H | -6.025614 | 0.489204  | -2.729296 |

Apoavidin-2H<sub>2</sub>O Complex:

|   |           |           |           |
|---|-----------|-----------|-----------|
| C | 0.000000  | 0.000000  | 0.000000  |
| C | 0.000000  | 0.000000  | 5.742845  |
| C | 3.423608  | 0.000000  | 4.266140  |
| C | 5.594571  | 2.361263  | 6.449167  |
| C | 5.283385  | 0.117698  | 9.834019  |
| C | 5.847000  | 5.200299  | 10.187795 |
| O | 4.533629  | 5.388004  | 9.646551  |
| C | 6.000454  | 1.266361  | 10.199319 |
| C | 7.122395  | 1.162922  | 11.013635 |
| C | 7.559039  | -0.079331 | 11.482193 |
| C | 6.815196  | -1.220608 | 11.148814 |
| C | 5.690625  | -1.132415 | 10.318735 |
| O | 4.214959  | 0.217934  | 9.005427  |
| O | 4.685972  | 3.454171  | 6.640797  |
| N | 3.243459  | -0.157306 | 5.602652  |
| O | 3.536753  | 1.126714  | 3.790055  |
| C | -0.786672 | 0.007184  | 1.319056  |
| O | -1.739062 | 0.810858  | 1.480727  |
| O | -0.469610 | -0.839285 | 2.232116  |
| N | -0.001585 | 0.615074  | 4.564662  |
| O | 0.202660  | 0.657477  | 6.794743  |
| O | 2.422665  | 2.091932  | 7.883925  |
| O | 2.161077  | 3.934917  | 10.017871 |
| H | 1.419350  | 4.544614  | 10.107005 |
| H | 2.975087  | 4.480637  | 10.032689 |
| H | 2.147340  | 2.733230  | 8.569905  |
| H | 1.608310  | 1.632156  | 7.569919  |
| H | -0.201628 | -1.079959 | 5.732891  |
| H | 0.149261  | 1.613844  | 4.553995  |
| H | -0.243787 | 0.105572  | 3.675518  |
| H | -0.473487 | 0.652933  | -0.737689 |
| H | 0.067843  | -1.022117 | -0.389862 |
| H | 1.024698  | 0.345277  | 0.184387  |
| H | 3.467610  | -0.931432 | 3.678218  |
| H | 3.070901  | 0.659788  | 6.171173  |
| H | 3.040010  | -1.057156 | 6.011317  |
| H | 5.399504  | 1.857044  | 5.496447  |
| H | 6.602458  | 2.786696  | 6.423969  |
| H | 5.542059  | 1.629396  | 7.261878  |
| H | 3.798482  | 3.077651  | 6.785125  |
| H | 3.823959  | 1.101040  | 8.858835  |
| H | 5.119691  | -2.014771 | 10.047648 |
| H | 7.120753  | -2.195514 | 11.519677 |
| H | 8.437667  | -0.156959 | 12.115023 |
| H | 7.672911  | 2.062917  | 11.278079 |
| H | 5.666951  | 2.230735  | 9.831086  |
| H | 4.568492  | 5.170129  | 8.698563  |
| H | 5.747939  | 5.191228  | 11.275386 |
| H | 6.508871  | 6.025432  | 9.896515  |
| H | 6.288709  | 4.254542  | 9.860356  |

### S1. Residue Deletion Energies for the Streptavidin Model

| Streptavidin Model Residue | MP2 Energy <sup>a</sup>        | CPCM Energy <sup>a</sup>      | BSSE <sup>b</sup> |
|----------------------------|--------------------------------|-------------------------------|-------------------|
| Tyr 43                     | -1404.89149<br>(-1404.888018)  | -1401.75532<br>(-1401.763007) | 0.010601785501    |
| Ser 27                     | -1596.07986<br>(-1596.075887)  | -1592.29470<br>(-1592.302265) | 0.006194657776    |
| Asn 23                     | -1542.02426<br>(-1542.020687)  | -1538.38667<br>(-1538.393814) | 0.005580260928    |
| Asp 128                    | -1596.07265<br>(-1596.069185)  | -1592.29012<br>(-1592.298713) | 0.007347631835    |
| Ser 45                     | -1483.49764<br>(-1483.496347)  | -1483.49764<br>(-1480.00271)  | 0.008415489126    |
| Asp 128 – Asn 23 complex   | -397.3705319<br>(-397.3680946) | -421.962358<br>(-396.3050523) | 0.001761967181    |
| Tyr 43 – Ser 45 complex    | -421.96236<br>(-421.9614592)   | -420.64124<br>(-420.644975)   | 0.003387867152    |

<sup>a</sup> Open, using the MP2/6-31+G(d,p)//B3LYP/6-31+G(d,p) level of theory. CPCM energy using a dielectric of ether (4.33). Parentheses, using the MP2/6-31+G(d,p)//MPWB1K/6-31+G(d,p) level. <sup>b</sup> Counterpoise corrections applied to MP2 and CPCM energies.

### S2. Residue Deletion Energies for the Avidin Model

| Avidin Model Residue            | MP2 Energy <sup>a</sup> | CPCM Energy <sup>a</sup> | BSSE <sup>b</sup> |
|---------------------------------|-------------------------|--------------------------|-------------------|
| Tyr 33                          | -1574.337828            | -1570.716716             | 0.010258098729    |
| Ser 16                          | -1765.525333            | -1761.253985             | 0.005653311415    |
| Asn 12                          | -1711.474889            | -1707.348392             | 0.005562748910    |
| Thr 35                          | -1765.514124            | -1761.250144             | 0.007666781469    |
| Asn 118-Asp 13 Pair             | -1483.503307            | -1479.998475             | 0.006362899888    |
| Asn 118-Asp 13 – Asn 12 complex | -566.8365753            | -565.260084              | 0.001436317000    |
| Tyr 33 – Thr 35 complex         | -421.9630673            | -420.64199               | 0.003404387665    |

<sup>a</sup> Open, using the MP2/6-31+G(d,p)//B3LYP/6-31+G(d,p) level of theory. Parentheses, using the MP2/6-31+G(d,p)//MPWB1K/6-31+G(d,p) level. <sup>b</sup> Counterpoise corrections applied to MP2 and CPCM energies.



### S3. Residue Deletion Energies for the Avidin Model (Asp Removed)

| Avidin Model (no Asp)<br>Residue | MP2 Energy <sup>a</sup> | CPCM Energy <sup>a</sup> | BSSE <sup>b</sup> |
|----------------------------------|-------------------------|--------------------------|-------------------|
| Tyr 33                           | -1346.37407             | -1343.371602             | 0.009599490141    |
| Ser 16                           | -1537.560075            | -1533.908804             | 0.005407106255    |
| Asn 12                           | -1483.508681            | -1480.004137             | 0.005663986160    |
| Thr 35                           | -1537.545472            | -1533.903801             | 0.004812375913    |
| Asn 118                          | -1483.503382            | -1479.998755             | 0.004812375913    |
| Asn 118 – Asn 12<br>complex      | -338.8883409            | -337.917906              | 0.002413303678    |
| Tyr 33 – Thr 35<br>complex       | -420.642538             | -421.9635639             | 0.003285178778    |

<sup>a</sup> Open, using the MP2/6-31+G(d,p)//B3LYP/6-31+G(d,p) level of theory. CPCM energy using a dielectric of ether (4.33). Parentheses, using the MP2/6-31+G(d,p)//MPWB1K/6-31+G(d,p) level. <sup>b</sup> Counterpoise corrections applied to MP2 and CPCM energies.

### S4. Water Biotin Interaction Energies

|                   | MP2 Energy <sup>a</sup> | CPCM Energy <sup>a</sup> | BSSE <sup>b</sup> |
|-------------------|-------------------------|--------------------------|-------------------|
| Biotin (CO)-water | -1005.4007796           | -1003.481918             | 0.005729721401    |
| Biotin (NH)-water | -1005.4020336           | -1003.485110             | 0.006056650322    |
| Water-dimer       | -152.4740698            | -152.082446              | 0.003006652568    |

<sup>a</sup> Open, using the MP2/6-31+G(d,p)//B3LYP/6-31+G(d,p) level of theory. CPCM energy using dielectric of water (78.39). <sup>b</sup> Counterpoise corrections applied to MP2 and CPCM energies.

### S5. Residue Model energies

| Residue Mimic                              | MP2 Energy <sup>a</sup>        | CPCM Energy <sup>a</sup>    |
|--------------------------------------------|--------------------------------|-----------------------------|
| Tyrosine 33/43<br>(Phenol)                 | -306.5608022<br>(-227.9039438) | -305.58626<br>(-305.589031) |
| Serine 27/45<br>Threonine 35<br>(Methanol) | -115.39195<br>(-115.3931775)   | -115.05571<br>(-115.057069) |
| Aspartate 128/13<br>(Acetate)              | -227.90543<br>(-227.9039438)   | -227.33998<br>(-227.341906) |
| Asparagine 23/118<br>(Formamide)           | -169.43544<br>(-169.4349842)   | -168.95678<br>(-168.958812) |

<sup>a</sup> Open, using the MP2/6-31+G(d,p)//B3LYP/6-31+G(d,p) level of theory. CPCM energy using a dielectric of ether (4.33). Parentheses, using the MP2/6-31+G(d,p)//MPWB1K/6-31+G(d,p) level.

S6. Cooperative Hydrogen-Bonding Energies (IRBE - BSRBE) in kcal/mol for Streptavidin Residues

| Streptavidin Residues | $\Delta\Delta E_{\text{coop(vac)}}^a$ | $\Delta\Delta E_{\text{coop(CPCM)}}^b$ | $\Delta\Delta E_{\text{coop(CPCM)}} + \text{CP}^c$ |
|-----------------------|---------------------------------------|----------------------------------------|----------------------------------------------------|
| Tyr 43                | -7.0 (-8.8)                           | -4.9 (-5.9)                            | -4.5                                               |
| Ser 27                | -4.9 (-4.8)                           | +0.6 (-0.4)                            | +2.2                                               |
| Asn 23                | +6.9 (+6.8)                           | -0.2 (-1.1)                            | +0.3                                               |
| Asp 128               | -9.7 (-26.8)                          | -7.0 (-6.4)                            | -6.6                                               |
| Ser 45                | -2.5 (-7.3)                           | -2.2 (-3.0)                            | -2.0                                               |
| TOTAL                 | -17.2 (-41.2)                         | -13.7 (-16.2)                          | -10.6                                              |

<sup>a</sup> MP2/6-31+G(d,p)//B3LYP/6-31+G(d,p). MP2/6-31+G(d,p)//MPWB1K/6-31+G(d,p) in parentheses. <sup>b</sup> CPCM/HF/6-31+G(d,p) level corrections to MP2 energies using the dielectric of ether ( $\epsilon = 4.33$ ). <sup>c</sup> MP2 and CPCM energies plus CP correction.

S7. Cooperative Hydrogen-Bonding Energy (IRBE - BSRBE) in kcal/mol for Avidin and Avidin with Asp 13 Removed Models

| Protein Residues        | $\Delta\Delta E_{\text{coop(vac)}}^a$ | $\Delta\Delta E_{\text{coop(CPCM)}}^b$ | $\Delta\Delta E_{\text{coop(CPCM)}} + \text{CP}^c$ |
|-------------------------|---------------------------------------|----------------------------------------|----------------------------------------------------|
| Avidin                  |                                       |                                        |                                                    |
| Tyr 33                  | -5.2                                  | -4.1                                   | -2.9                                               |
| Ser 16                  | -3.3                                  | +1.5                                   | +3.3                                               |
| Asn 12                  | +4.7                                  | -0.4                                   | +0.3                                               |
| Asn 118-Asp 13 pair     | -3.8                                  | -5.4                                   | -4.3                                               |
| Thr 35                  | -4.2                                  | -2.5                                   | -2.2                                               |
| TOTAL                   | -11.8                                 | -10.9                                  | -5.8                                               |
| Avidin (Asp 13 removed) |                                       |                                        |                                                    |
| Tyr 33                  | -2.4                                  | -2.8                                   | -1.9                                               |
| Ser 16                  | -1.8                                  | +2.0                                   | +1.5                                               |
| Asn 12                  | +1.3                                  | +1.3                                   | +1.4                                               |
| Asn 118                 | +4.6                                  | -0.9                                   | -1.4                                               |
| Thr 35                  | -4.6                                  | -3.2                                   | -2.7                                               |
| TOTAL                   | -2.9                                  | -3.6                                   | -3.1                                               |

<sup>a</sup> MP2/6-31+G(d,p)//B3LYP/6-31+G(d,p). <sup>b</sup> CPCM/HF/6-31+G(d,p) level corrections to MP2 energies using the dielectric of ether ( $\epsilon = 4.33$ ). <sup>c</sup> MP2 and CPCM energies plus CP correction.

S8. unliganded-(Strept)Avidin

|                                         | MP2 Energy   | CPCM energy<br>( $\epsilon = 4.33$ ) | CPCM energy<br>( $\epsilon = 78.39$ ) |
|-----------------------------------------|--------------|--------------------------------------|---------------------------------------|
| Streptavidin-7H <sub>2</sub> O          | -1468.544343 | -1464.278510                         | -1464.307466                          |
| Avidin-2H <sub>2</sub> O                | -1256.712862 | -1253.022856                         | -1253.061563                          |
| Streptavidin-7H <sub>2</sub> O Scaffold | -1010.988107 | -1008.017594                         | -1008.063688                          |
| Avidin Scaffold                         | -1100.919481 | -1104.181153                         | -1100.967635                          |
| 6bound waters (streptavidin)            | -457.4336995 | -456.217913                          | -456.241193                           |
| 2bound waters (avidin)                  | -152.4739558 | -152.074499                          | -152.083672                           |
| 1 water                                 | -76.233097   | -76.036526                           | -76.042035                            |

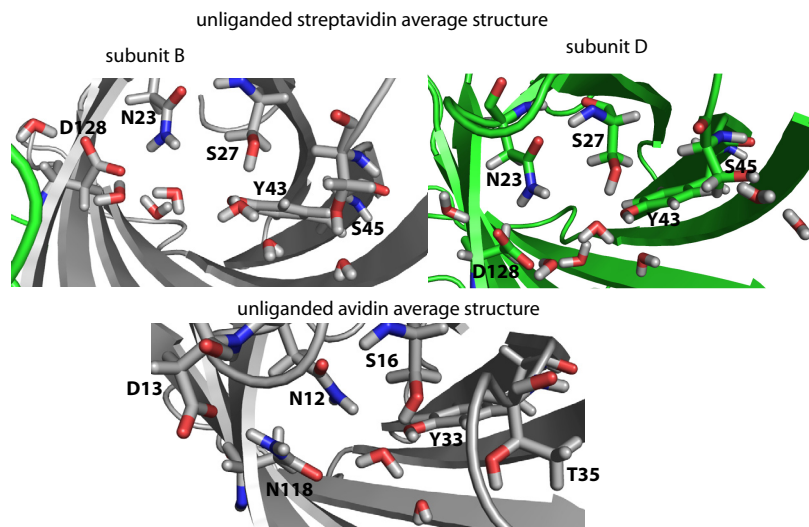

Average structures from MD simulations: (Top) unliganded streptavidin with seven waters interacting with the hydrogen bonding residues in subunit B and D and (Bottom) unliganded avidin with two binding site waters.

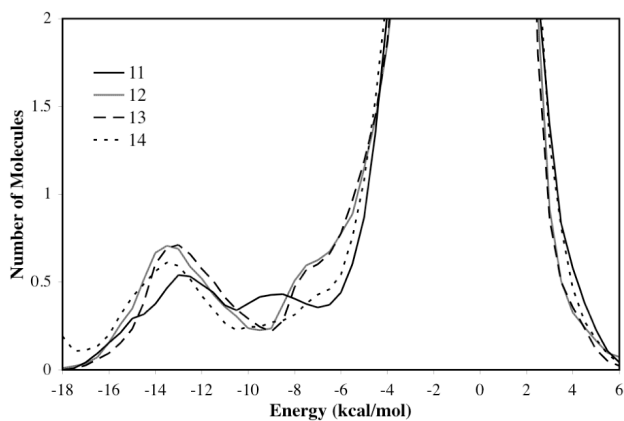

Solute-solvent energy pair distributions for different structures of D(+)-biotin. Details are as in *Figure 11*.

Solute-solvent energy pair distributions have been computed (Figure 7), and notably in the energy ranges of -16 to -12 and -10 to -6 kcal/mol the intramolecular hydrogen bond conformer clearly provides the least favorable interactions compared to the other three conformers.
